# Supplementary material
Source: PubMed Central journal article supplement (PMC7808155)
Supplement: ao0c05430_si_001.pdf [file ao0c05430_si_001.pdf]

## Supporting Information

### Instantaneous adsorption of synthetic dyes from the aqueous environment using kaolinite nanotubes; equilibrium and thermodynamic studies

Mostafa R. Abukhadra\*†‡, Merna Mostafa †‡, Ahmed M. El-Sherbeeny \*\*§, Mohammed A. El-Meligy\*, Ahmed Nadeem&

†Geology Department, Faculty of Science, Beni-Suef University, Beni –Suef city, Egypt

‡Materials Technologies and their Applications Lab, Geology Department, Faculty of Science, Beni-Suef University, Beni-Suef City, Egypt.

§ Industrial Engineering Department, College of Engineering, King Saud University, P.O. Box 800, Riyadh 11421, Saudi Arabia

\*Advanced Manufacturing Institute, King Saud University, Riyadh-11421, Saudi Arabia

& Department of Pharmacology & Toxicology, College of Pharmacy, King Saud University, Riyadh, Saudi Arabia

### Content

|                                                                                                               |    |
|---------------------------------------------------------------------------------------------------------------|----|
| 1. Figure S1. TEM image of raw kaolinite mineral .....                                                        | S2 |
| 2. Figure S2. The nitrogen adsorption/desorption isotherm curves of KNTs .....                                | S2 |
| 3. Figure S3. the uptake capacity of KNTs at different concentrations of SF, MG, CR, and MO dyes .....        | S3 |
| 4. Figure S4. Fitting of the dyes adsorption results with Elovich kinetic model .....                         | S3 |
| 5. Figure S5. fitting of the dyes adsorption results with Van't Hoff Hof equation.....                        | S4 |
| 6. Figure S6. the removal percentages of SF, MG, CR, and MO dyes at the recyclability tests of KNTs.....      | S4 |
| 7. Figure S7. the FT-IR spectra of KNTs after the adsorption of SF (A), MG (B), CR (C), and MO dyes (D).....  | S5 |
| 8. Table S1. the representative equations of the studied kinetic and isotherm model and their parameters..... | S6 |

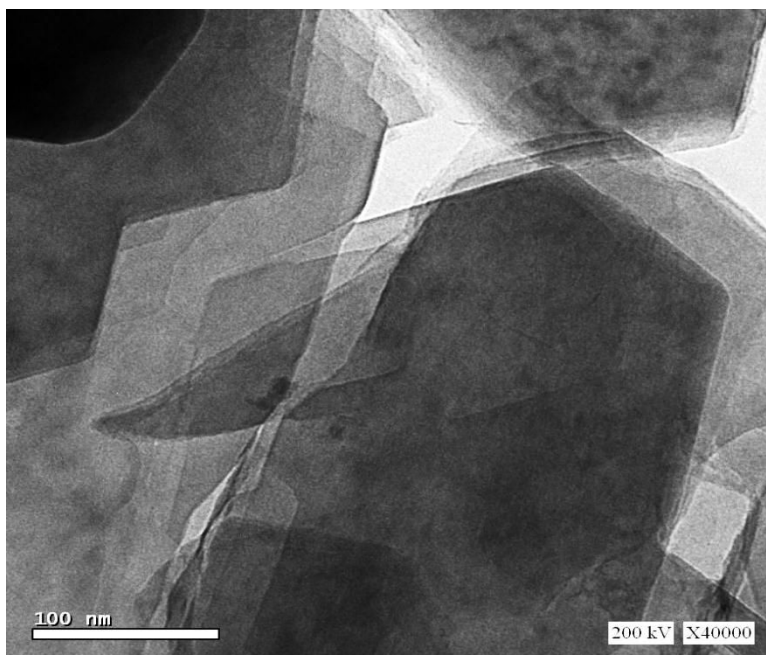

**Figure S1.** TEM image of raw kaolinite mineral

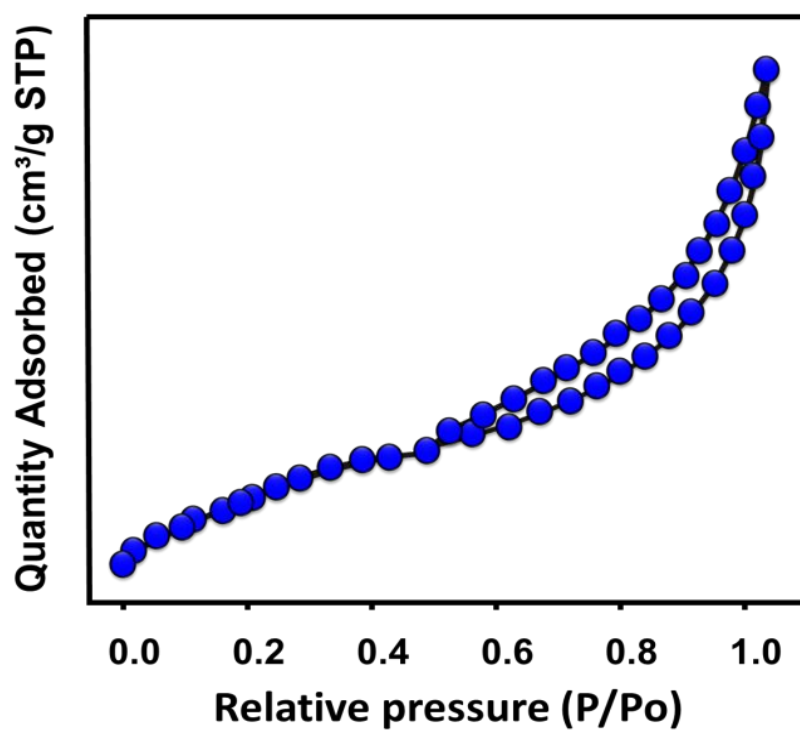

**Figure S2.** the nitrogen adsorption/desorption isotherm curves of KNTs

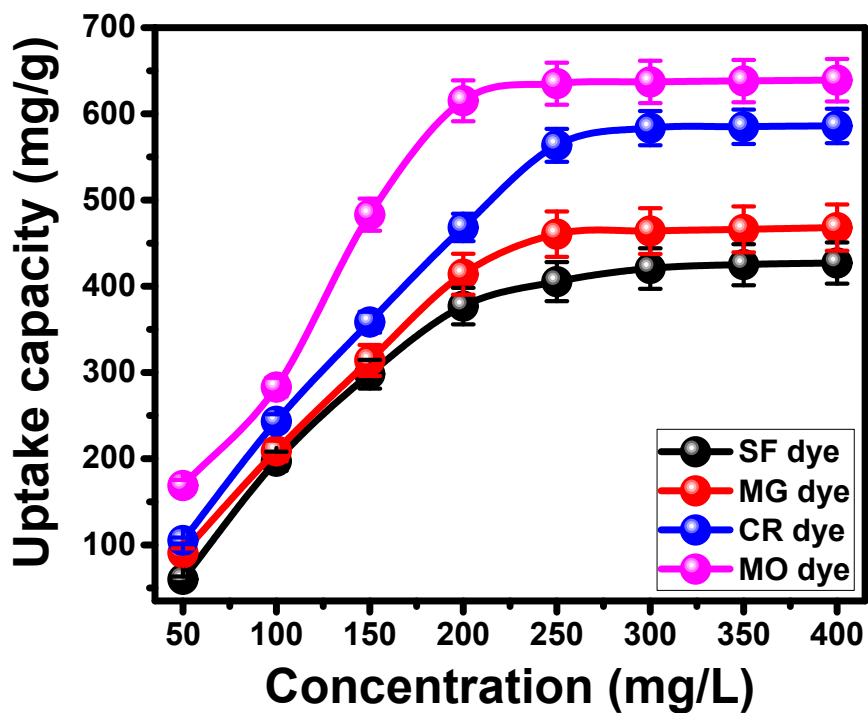

Figure S3. the uptake capacity of KNTs at different concentrations of SF, MG, CR, and MO dyes

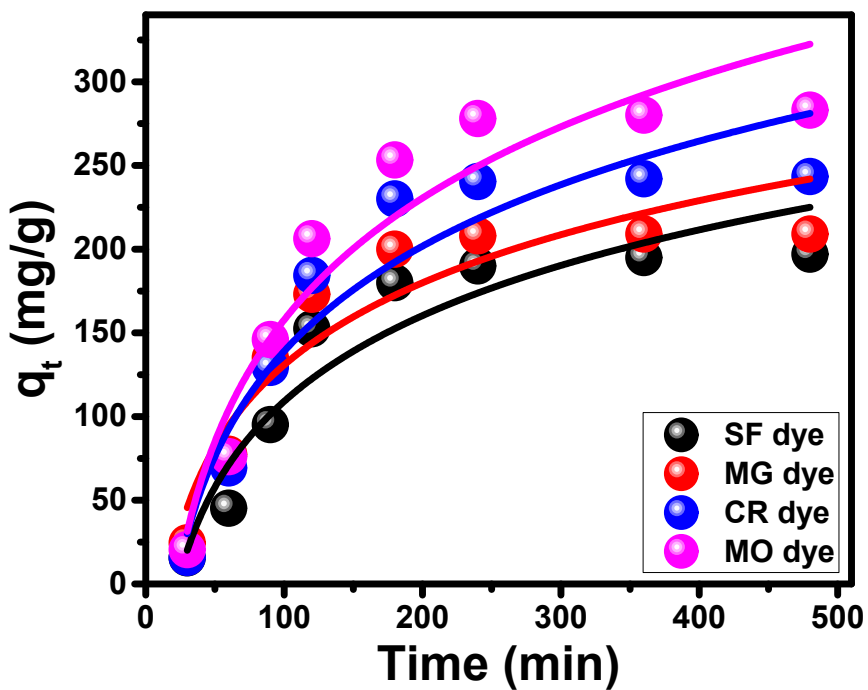

Figure S4. Fitting of the dyes adsorption results with Elovich kinetic model

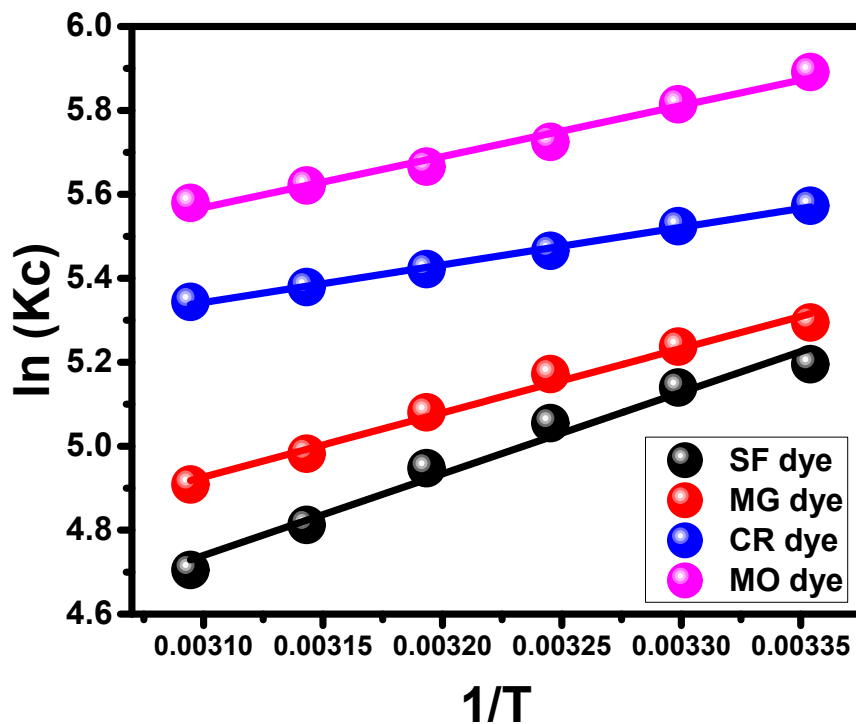

Figure S5. fitting of the dyes adsorption results with Van't Hoff equation

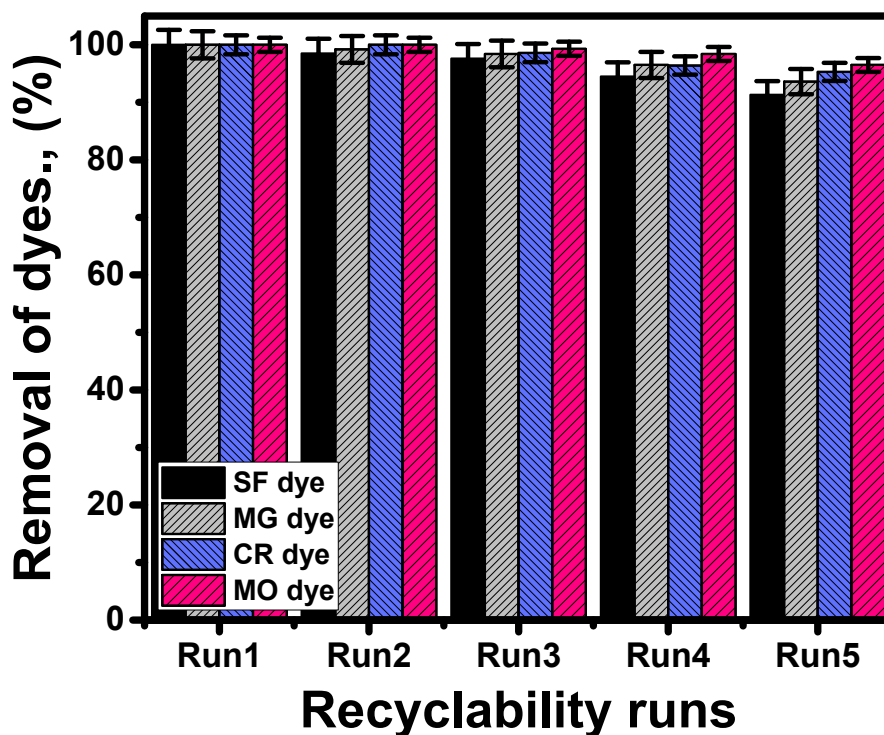

Figure S6. the removal percentages of SF, MG, CR, and MO dyes at the recyclability tests of KNTs

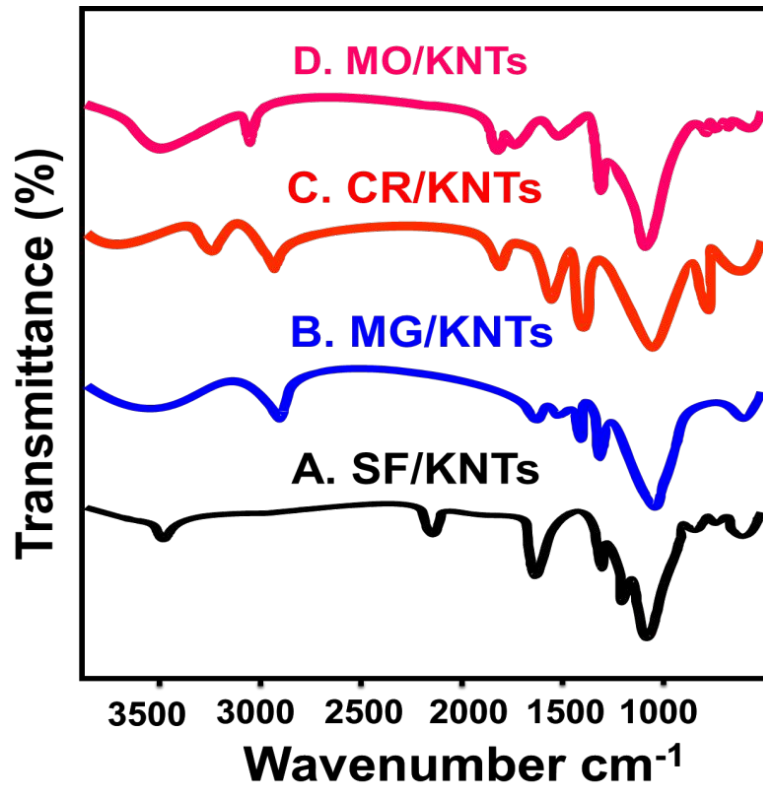

**Figure S7.** the FT-IR spectra of KNTs after the adsorption of SF (A), MG (B), CR (C), and MO dyes (D)

**Table S1.** the representative equations of the studied kinetic and isotherm model and their parameters

| <b>Kinetic models</b>           |                                                                                                                                               |                                                                                                                                                                         |
|---------------------------------|-----------------------------------------------------------------------------------------------------------------------------------------------|-------------------------------------------------------------------------------------------------------------------------------------------------------------------------|
| <b>Model</b>                    | <b>Linear equation</b>                                                                                                                        | <b>Parameters</b>                                                                                                                                                       |
| <b>Pseudo-first-order</b>       | $\ln (q_e - q_t) = \ln q_e - k_1 t$ (Linear)<br>$q_t = q_e (1 - e^{-k_1 t})$ (Nonlinear)                                                      | $q_t$ (mg/g) is the adsorbed ions at time (t), and $K_1$ is the rate constant of the first-order adsorption ( $\text{min}^{-1}$ )                                       |
| <b>Pseudo-second-order</b>      | $\frac{t}{q_t} = \frac{1}{K_2 q_e^2} + \frac{t}{q_e}$ (Linear)<br>$q_t = \frac{q_e^2 k_2 t}{1 + q_e k_2 t}$ (Nonlinear)                       | $q_e$ is the quantity of adsorbed ions after equilibration (mg/g), and $K_2$ is Lagergren model rate constant (g/mg min).                                               |
| <b>Elovich model</b>            | $q_t = \frac{1}{\beta} \ln (\alpha \beta) + \frac{1}{\beta} \ln (t)$ (Linear)<br>$q_t = \frac{1}{\beta} \ln (1 + \alpha \beta t)$ (Nonlinear) | $\alpha$ is the initial adsorption rate (mg/min) and $\beta$ is the surface saturation (g/mg)                                                                           |
| <b>Intra-particle diffusion</b> | $q_t = K_p t^{1/2} + C$ (Linear)<br>$q_t = kt^{0.5} + C$ (Nonlinear)                                                                          | $K_p$ ( $\text{mg g}^{-1} \text{min}^{-0.5}$ ) is the intraparticle diffusion rate constant and C is the intercept of the line                                          |
| <b>Isotherm models</b>          |                                                                                                                                               |                                                                                                                                                                         |
| <b>Model</b>                    | <b>Equation</b>                                                                                                                               | <b>Parameters</b>                                                                                                                                                       |
| <b>Langmuir</b>                 | $\frac{C_e}{q_e} = \frac{1}{b q_{\max}} + \frac{C_e}{q_{\max}}$ (Linear)<br>$q_e = \frac{q_{\max} b C_e}{(1 + b C_e)}$ (Nonlinear)            | $C_e$ is the rest ions concentrations (mg/L), $q_{\max}$ is the theoretical maximum adsorption capacity (mg/g), and $b$ is the Langmuir constant (L/mg)                 |
| <b>Freundlich</b>               | $\log q_e = (1/n) \log C_e + \log K_f$ (Linear)<br>$q_e = K_f C_e^{1/n}$ (Nonlinear)                                                          | $K_f$ is the constant of Freundlich model related to the adsorption capacity and $n$ is the constant of Freundlich model related to the adsorption intensities          |
| <b>Dubinin–Radushkevich</b>     | $\ln (q_e) = \ln (q_m) - \beta \varepsilon^2$ (Linear)<br>$q_e = q_m e^{-\beta \varepsilon^2}$ (Nonlinear)                                    | $\beta$ ( $\text{mol}^2/\text{KJ}^2$ ) is the D-R constant, $\varepsilon$ ( $\text{KJ}^2/\text{mol}^2$ ) is the polanyi potential, and $q_m$ is the adsorption capacity |
